# Supplementary material for: A simple maskless process for the fabrication of vertically aligned high density hematite and graphene/magnetite nanowires
Source: Royal Society of Chemistry journal article supplement (doi:10.1039/c6tc05162f), 2017-01-01
Supplement: c6tc05162f1.pdf [file c6tc05162f1.pdf]

## Supporting Information

# A simple maskless process for fabrication of vertically aligned high density hematite and graphene/magnetite nanowires

*Seungmin Shin,<sup>†</sup> Sung-Wook Kim,<sup>‡</sup> Ji-Hyun Jang<sup>\*,‡</sup> and Jin-Baek Kim<sup>\*,†</sup>*

<sup>†</sup>Department of Chemistry, Korea Advanced Institute of Science and Technology (KAIST),  
291 Daehak-ro, Yuseong-gu, Daejeon 34141, Republic of Korea

<sup>‡</sup>School of Energy and Chemical Engineering, Low Dimensional Carbon Materials Center,  
Ulsan National Institute of Science and Technology (UNIST), Ulsan 44919, Republic of Korea

\*E-mail: [jbkim21@kaist.ac.kr](mailto:jbkim21@kaist.ac.kr) and [clau@unist.ac.kr](mailto:clau@unist.ac.kr)

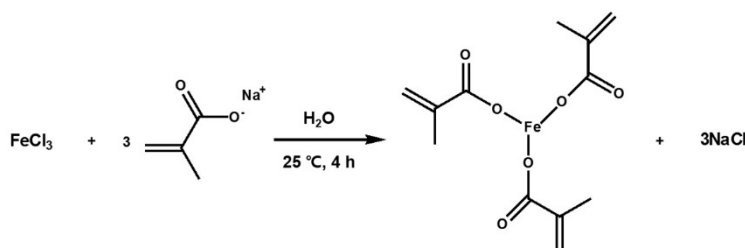

**Figure S1.** The synthetic scheme of iron(III) methacrylate.

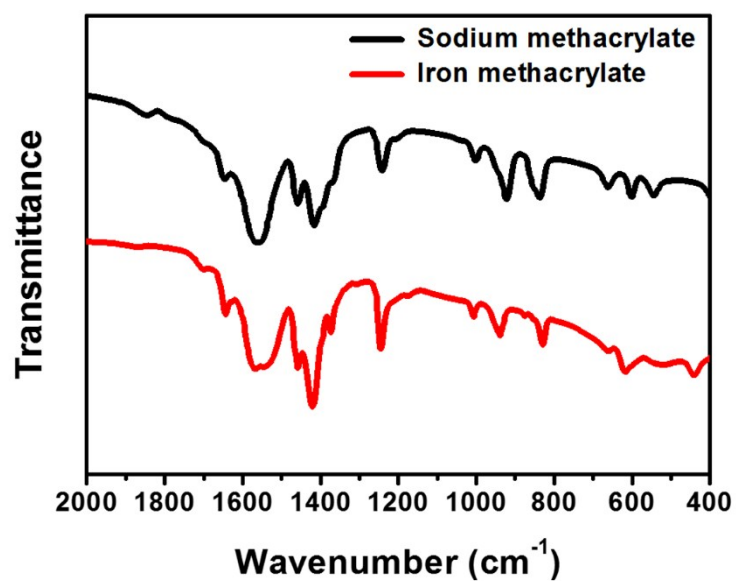

**Figure S2.** FTIR spectrum of sodium methacrylate and iron methacrylate.

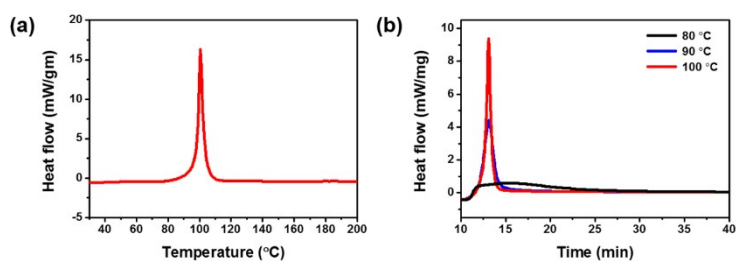

**Figure S3.** The heat released during (a) nonisothermal and (b) isothermal crosslinking reaction of the formulated resin in DSC data.

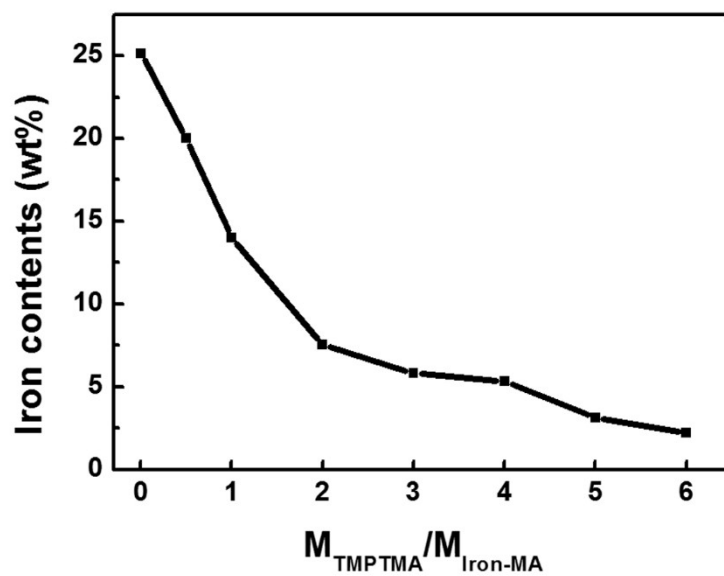

**Figure S4.** Iron content versus the mass ratio of TMPTMA/iron methacrylate at a fixed mass ratio of MMA/iron methacrylate.

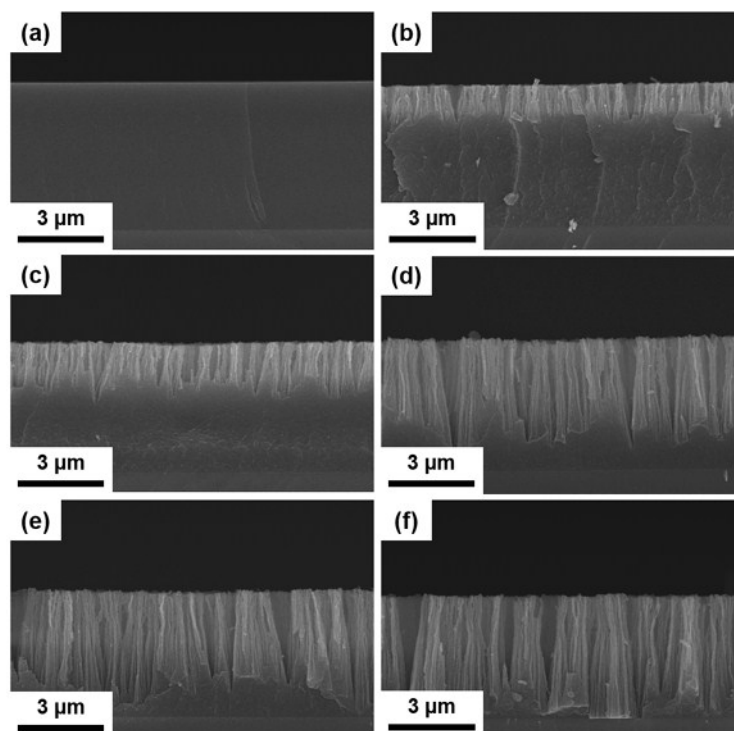

**Figure S5.** Cross-sectional SEM images of the oxygen plasma exposed film ( $M_{\text{Iron-MA}}$  :

$M_{\text{TMPTMA}} : M_{\text{MMA}} = 1:4:4$ ) with different etching times. (a) 0 min, (b) 5 min, (c) 8 min, (d) 10 min, (e) 15 min and (f) 20 min.

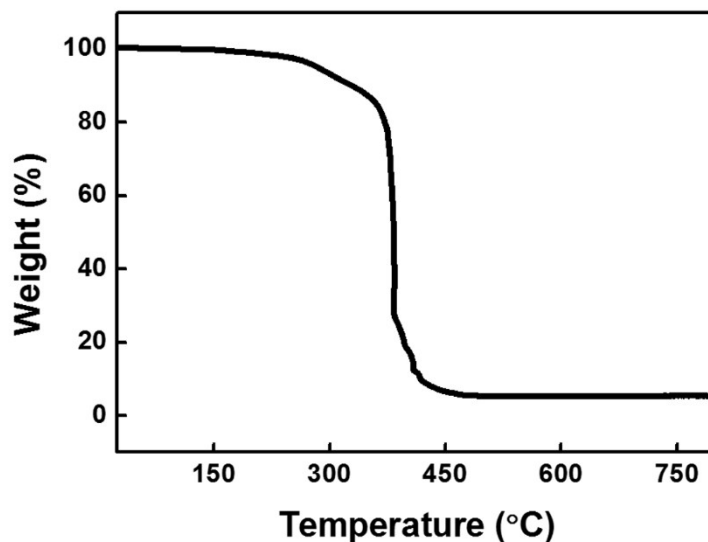

**Figure S6.** Thermal gravimetric analysis (TGA) of the cured composite resin. The organic portion decomposed in a temperature range of 300-430 °C, leaving behind about 5.4 % of the original mass.

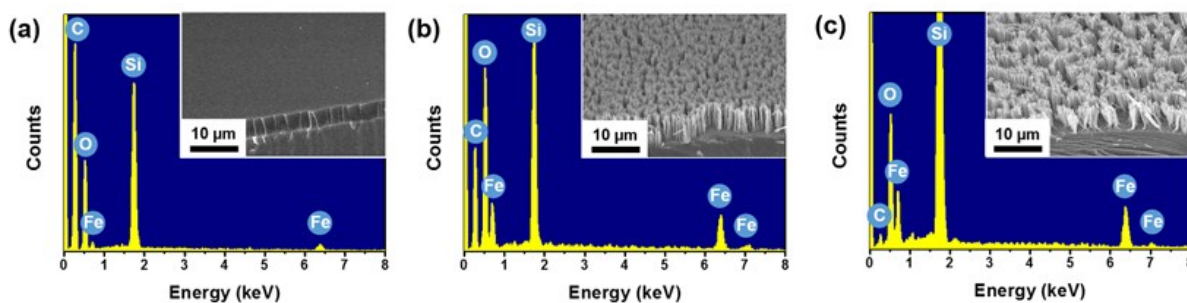

**Figure S7.** EDS data obtained from (a) iron-containing polymer film after curing, (b) iron oxide/organic nanowires after oxygen plasma treatment and (c) hematite nanowires after calcination at 500 °C for 1 hr. (inset images : SEM images of each measured samples)

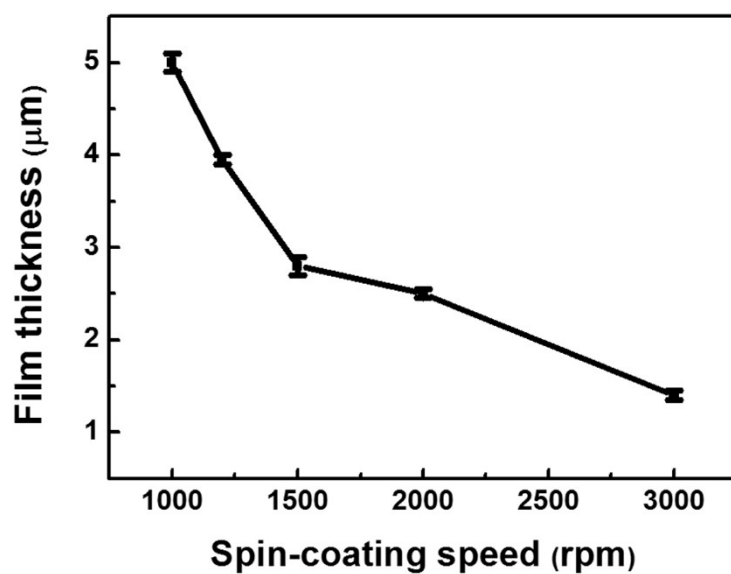

**Figure S8.** Control of film thickness by adjustment of spin coating speed for the 1:4:4 ( $M_{\text{Iron MA}} : M_{\text{TMPTMA}} : M_{\text{MMA}}$ ) composite resin.

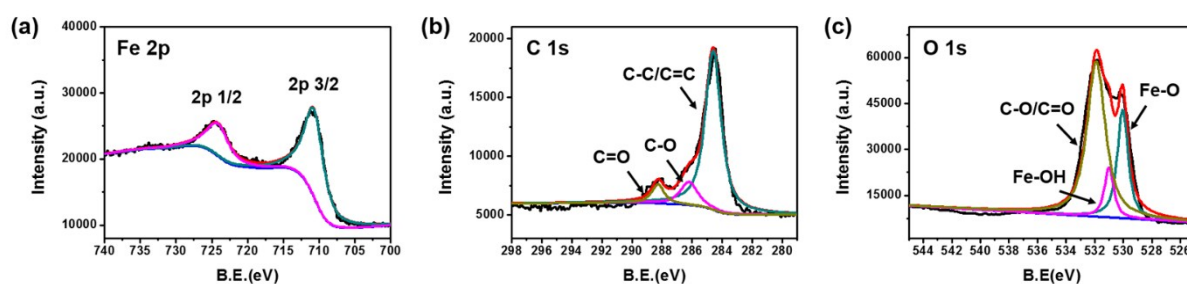

**Figure S9.** XPS spectra of the graphene/magnetite nanowires after carbonization: (a) Fe 2p, (b) C 1s and (c) O 1s.

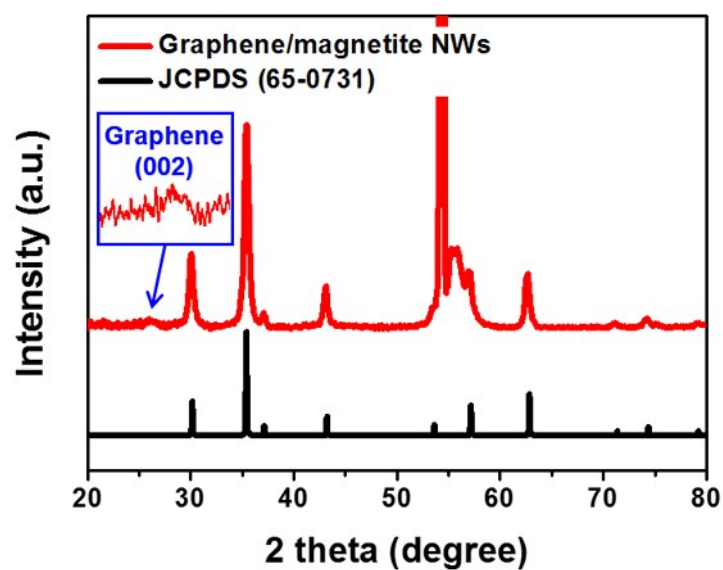

**Figure S10.** XRD data of the graphene/magnetite nanowires on Si substrate.

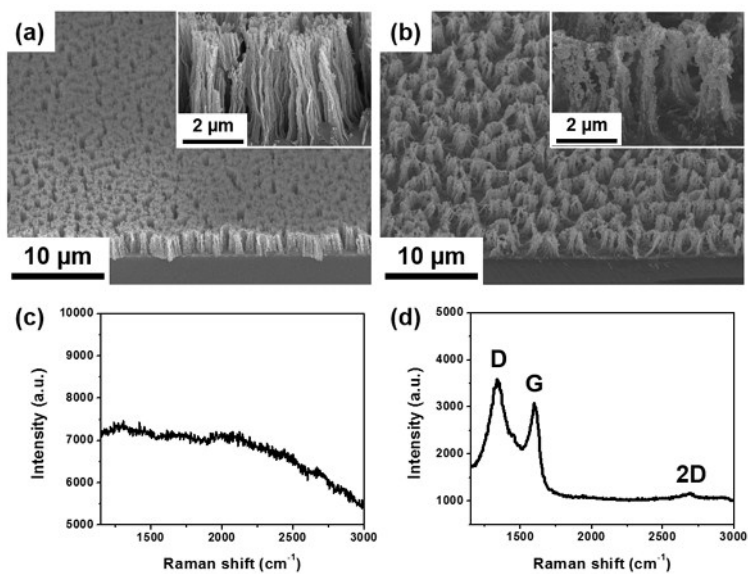

**Figure S11.** Cross-sectional SEM images and of nanowire arrays (a) before and (b) after carbonization at 700 °C for 30 min under H<sub>2</sub>/Ar 50/50 sccm. Raman spectra of each obtained nanowires (c) before and (d) after carbonization, respectively.

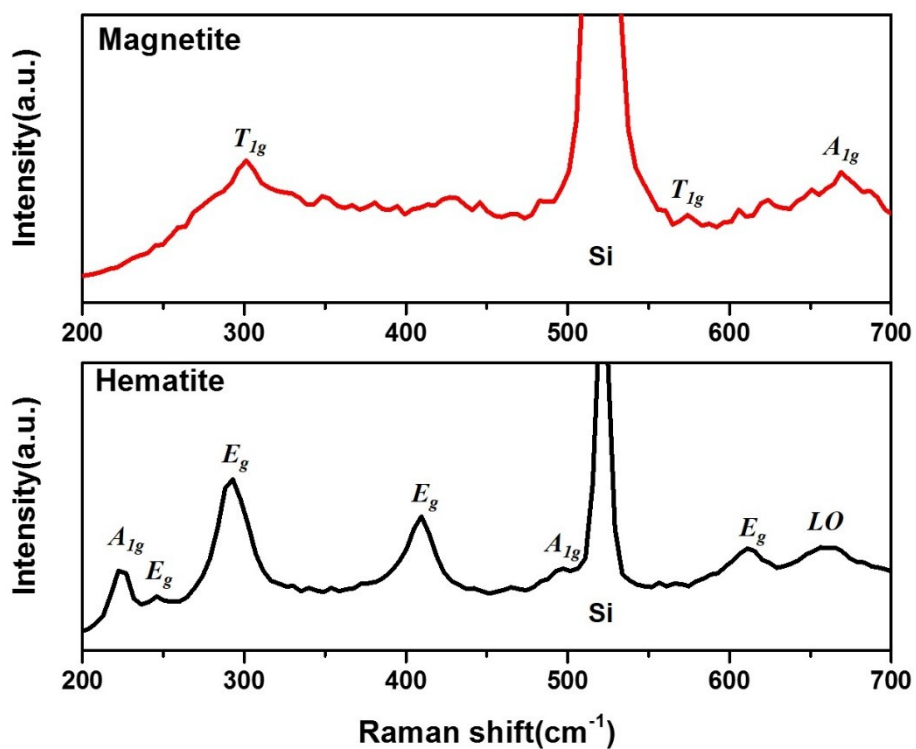

**Figure S12.** Raman spectra of hematite nanowires calcined at 500 °C in air and graphene/magnetite nanowires calcined at 700 °C in H<sub>2</sub>/Ar.

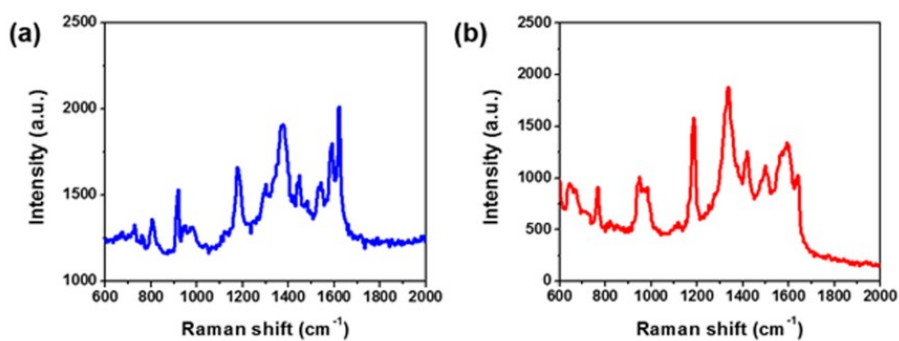

**Figure S13.** Raman spectra of (a) Crystal violet and (b) fluorescein dye on graphene/magnetite nanowires.

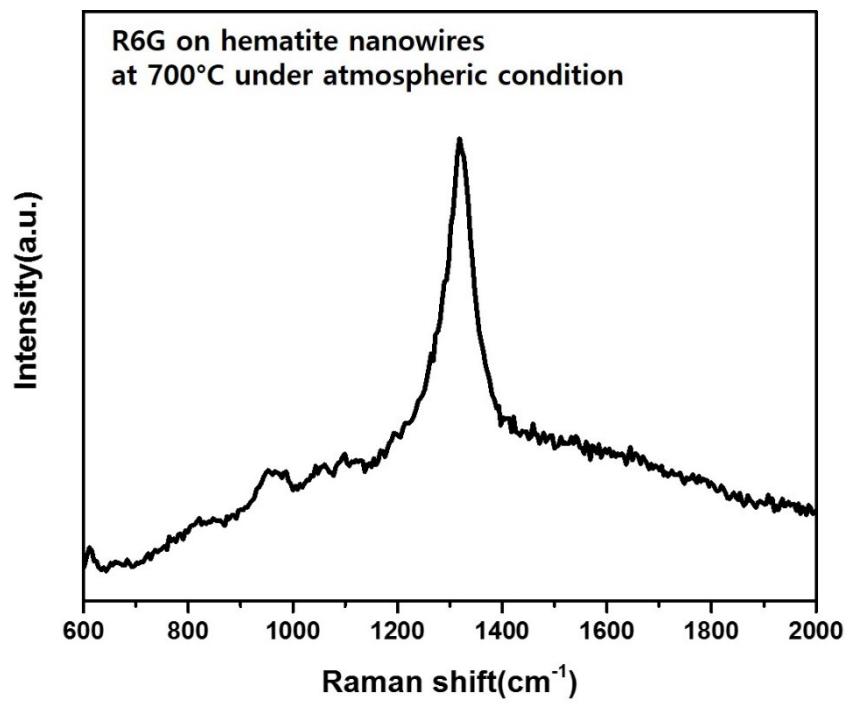

**Figure S14.** Raman spectra of R6G on hematite nanowires calcined at 700 °C in air



**Table S1.** Comparison study of multilayered-graphene/magnetite nanowires in this work and previously reported GERS substrates.

| GERS substrate                    | Probe molecules                   | Enhancement factor    | Reference substrate            | Reference    |
|-----------------------------------|-----------------------------------|-----------------------|--------------------------------|--------------|
| Graphene monolayer                | Phthalocyanine, Rhodamine 6G, etc | 2-17                  | SiO <sub>2</sub> /Si substrate | 1            |
| Graphene nanomesh                 | Rhodamine B                       | 2                     | Single layer graphene          | 2            |
| Graphene quantum dots             | Rhodamine 6G                      | 40-74                 | Si substrate                   | 3            |
| Graphene monolayer                | Copper phthalocyanine             | 47.3                  | SiO <sub>2</sub> /Si substrate | 4            |
| Reduced graphene monolayer        | Rhodamine 6G                      | 3-13                  | SiO <sub>2</sub> /Si substrate | 5            |
| Reduced graphene oxide nanosheets | Rhodamine B                       | ~ 10 <sup>3</sup>     | SiO <sub>2</sub> /Si substrate | 6            |
| UV/Ozone-Oxidized Graphene        | Rhodamine B                       | 2.6 × 10 <sup>4</sup> | SiO <sub>2</sub> /Si substrate | 7            |
|                                   | Rhodamine 6G                      | 1.6 × 10 <sup>4</sup> |                                |              |
| Present work                      | Rhodamine 6G                      | 7.0 × 10 <sup>4</sup> | Si substrate                   | In this work |

## REFERENCES

- (1) Ling, X.; Xie, L.; Fang, Y.; Xu, H.; Zhang, H.; Kong, J.; Dresselhaus, M. S.; Zhang, J.; Liu, Z. Can Graphene Be Used as a Substrate for Raman Enhancement? *Nano Lett.* **2010**, *10* (2), 553–561.
- (2) Liu, J.; Cai, H.; Yu, X.; Zhang, K.; Li, X.; Li, J.; Pan, N.; Shi, Q.; Luo, Y.; Wang, X. Fabrication of Graphene Nanomesh and Improved Chemical Enhancement for Raman Spectroscopy. *J. Phys. Chem. C* **2012**, *116* (29), 15741–15746.
- (3) Cheng, H.; Zhao, Y.; Fan, Y.; Xie, X.; Qu, L.; Shi, G. Graphene-Quantum-Dot Assembled Nanotubes: A New Platform for Efficient Raman Enhancement. *ACS Nano* **2012**, *6* (3), 2237–2244.
- (4) Huang, S.; Ling, X.; Liang, L.; Song, Y.; Fang, W.; Zhang, J.; Kong, J.; Meunier, V.; Dresselhaus, M. S. Molecular Selectivity of Graphene-Enhanced Raman Scattering. *Nano Lett.* **2015**, *15* (5), 2892–2901.
- (5) Yin, F.; Wu, S.; Wang, Y.; Wu, L.; Yuan, P.; Wang, X. Self-Assembly of Mildly Reduced Graphene Oxide Monolayer for Enhanced Raman Scattering. *J. Solid State Chem.* **2016**, *237*, 57–63.
- (6) Yu, X.; Cai, H.; Zhang, W.; Li, X.; Pan, N.; Luo, Y.; Wang, X.; Hou, J. G. Tuning Chemical Enhancement of SERS by Controlling the Chemical Reduction of Graphene Oxide Nanosheets. *ACS Nano* **2011**, *5* (2), 952–958.
- (7) Huh, S.; Park, J.; Kim, Y. S.; Kim, K. S.; Hong, B. H.; Nam, J.-M. UV/Ozone-Oxidized Large-Scale Graphene Platform with Large Chemical Enhancement in Surface-Enhanced Raman Scattering. *ACS Nano* **2011**, *5* (12), 9799–9806.
